# Supplementary material
Source: HighWire-hosted journal article supplement (https://cmaj.ca/highwire/filestream/149578/field_highwire_adjunct_files/1/230715-guide-f1-text-only.pdf)
Supplement: 230715-guide-f1-text-only.pdf [file 230715-guide-f1-text-only.pdf]

## Clinical Practice Guideline

# Alcohol use disorder and high-risk drinking

57% of Canadians aged 15 years and older drink above low-risk levels

- Alcohol use disorder (AUD): Pattern of heavy alcohol use and loss of control over intake despite negative consequences
- High-risk drinking and AUD frequently go unrecognized and untreated. Effective treatments are available
- Primary care providers are key to early detection and treatment

## Overview of clinical pathway

### Ask about alcohol

*“Would it be all right for us to talk about your relationship with alcohol?”*

- Asking permission builds trust and comfort

### Screening and diagnosis

*“In the past year, how often have you had more than 4 drinks (females) or 5 drinks (males) on any 1 occasion?”*

- If 1 occasion or more, ask further screening questions (AUDIT-C\*)
- For moderate risk of AUD: Provide brief advice on the health risks and suggestions on how to cut back
- For high risk of AUD: Diagnose using DSM-5-TR criteria

### Assess their goals

If moderate or severe AUD, use brief intervention to discuss goals and a tailored plan:

- Stop drinking
- Cut back on drinking
- Reduce harms of drinking

### Withdrawal management

Use PAWSS\* and withdrawal history to determine if low or high risk of severe complications (e.g., delirium tremens, seizures):

- Low risk: outpatient; Rx gabapentin, clonidine
- High risk: inpatient; Rx short course of benzodiazepines

### Long-term treatment

- Medications: (1st line) Rx naltrexone or acamprostate; avoid SSRIs,\* antipsychotics and long-term benzodiazepines
- Psychosocial treatments: Cognitive behavioural therapy, family-based therapy
- Community supports: Supportive recovery programs, peer groups, etc.

\*AUDIT-C = Alcohol Use Disorder Identification Test–Consumption PAWSS = Prediction of Alcohol Withdrawal Severity Scale SSRI = selective serotonin reuptake inhibitor
